# Supplementary material for: Functionalization of the NiTi Shape Memory Alloy Surface through Innovative Hydroxyapatite/Ag-TiO2 Hybrid Coatings
Source: MDPI journal article supplement (doi:10.3390/ma17030604), 2024-01-26
Supplement: s1 [file s1]

## Supplementary Materials

# Functionalization of the NiTi Shape Memory Alloy Surface by Innovative Hydroxyapatite/Ag-TiO<sub>2</sub> Hybrid Coatings

Karolina Dudek <sup>1,\*</sup>, Mateusz Dulski <sup>2,\*</sup>, Jacek Podwórny <sup>1</sup>, Magdalena Kujawa <sup>1</sup>, Anna Gerle <sup>1</sup> and Patrycja Rawicka <sup>3</sup>

- <sup>1</sup> Łukasiewicz Research Network–Institute of Ceramics and Building Materials, Cementowa 8, 31-983 Kraków, Poland; jacek.poworny@icimb.lukasiewicz.gov.pl (J.P.); magdalena.kujawa@icimb.lukasiewicz.gov.pl (M.K.); anna.gerle@icimb.lukasiewicz.gov.pl (A.G.)  
<sup>2</sup> Institute of Materials Engineering, University of Silesia, 75 Pułku Piechoty 1A, 41-500 Chorzów, Poland  
<sup>3</sup> Institute of Physics, Faculty of Science and Technology, University of Silesia in Katowice, 75 Pułku Piechoty 1a, 41-500 Chorzów, Poland; patrycja.rawicka@us.edu.pl  
\* Correspondence: karolina.dudek@icimb.lukasiewicz.gov.pl (K.D.), mateusz.dulski@us.edu.pl (M.D.)

**Table S1.** Raman band assignment based on the spectra gathered before and after the sintering procedure.

| Initial                   |                           |                           |                                                         | After sintering           |                           |                           |                                     |
|---------------------------|---------------------------|---------------------------|---------------------------------------------------------|---------------------------|---------------------------|---------------------------|-------------------------------------|
| $\nu$ (cm <sup>-1</sup> ) | $\nu$ (cm <sup>-1</sup> ) | $\nu$ (cm <sup>-1</sup> ) | Assignment                                              | $\nu$ (cm <sup>-1</sup> ) | $\nu$ (cm <sup>-1</sup> ) | $\nu$ (cm <sup>-1</sup> ) | Assignment                          |
| 90                        | 110                       | 150                       | Ag lattice                                              |                           | 122                       | 133                       | Ag lattice/AgO/Ca(PO <sub>4</sub> ) |
| 120                       | 146                       | 208                       |                                                         |                           | 154                       | 243                       | AgO/Ca(PO <sub>4</sub> )            |
| 150                       | 210                       | 269                       |                                                         |                           | 222                       |                           | Ag–O–Ti/Ca(PO <sub>4</sub> )        |
| 212                       |                           |                           | Ag–O–Ti                                                 |                           |                           |                           |                                     |
| 270                       | 289                       |                           | multiple-phonon scattering processes                    | 268                       |                           |                           | defects                             |
| 344                       |                           | 337                       | defects                                                 | 371                       | 322                       | 323                       | C–Ag                                |
| 431                       |                           | 430                       | E <sub>g</sub>                                          | 428                       |                           | 440                       |                                     |
|                           |                           |                           |                                                         |                           |                           | 446                       | $\nu_2(\text{PO}_4)^{3-}$           |
| 513                       | 520                       |                           | defects                                                 | 507                       |                           |                           |                                     |
|                           |                           |                           | defects                                                 | 560                       |                           |                           |                                     |
| 606                       |                           |                           | A <sub>1g</sub> / $\nu_4(\text{PO}_4)^{3-}$             | 612                       |                           | 596                       | $\nu_4(\text{PO}_4)^{3-}$           |
|                           |                           |                           |                                                         |                           | 697                       |                           | chemisorbed oxygen species          |
|                           | 760                       | 798                       | chemisorbed oxygen species                              |                           | 792                       |                           |                                     |
|                           | 895                       |                           |                                                         |                           |                           |                           |                                     |
|                           |                           |                           |                                                         |                           |                           |                           |                                     |
| 971                       | 963                       | 969                       | $\nu_4(\text{CO}_3)^{2-}$ / $\nu_1(\text{PO}_4)^{3-}$ * |                           |                           | 958                       | $\nu_1(\text{PO}_4)^{3-}$           |
| 1398                      |                           | 1378                      | $\nu_1(\text{CO}_3)^{2-}$                               |                           | 1340                      | 1351                      | D                                   |
|                           |                           |                           |                                                         |                           |                           | 1483                      |                                     |
| 1577                      |                           |                           | $\nu_3(\text{CO}_3)^{2-}$                               |                           | 1580                      | 1604                      | G                                   |
